# Supplementary material
Source: PubMed Central journal article supplement (PMC6121978)
Supplement: zam018188720s1.pdf [file zam018188720s1.pdf]

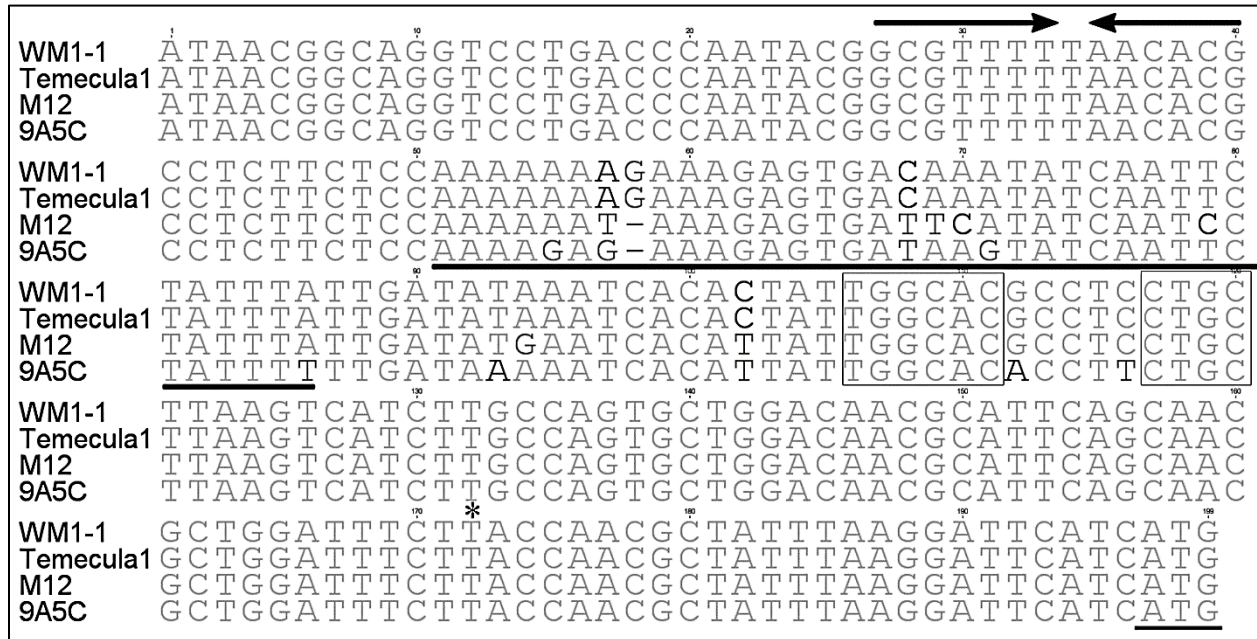

**Fig. S1** Determination of characteristic features of a  $\sigma^{54}$  binding sites in the promoter of *PilA2* (PD1926) of *Xylella fastidiosa* subspecies *fastidiosa* strains WM1-1 and Temecula1. *X. f.* subsp. *multiplex* strain M12 and subsp. *pauca* strain 9a5c are included for comparison. Translation start site (ATG), and integration host factor binding sites are underlined. Asterisk (\*) indicates the conserved transcription start site that is 66bp upstream of the translation start site predicted previously for strain 9a5c. Boxed regions indicate conserved elements of -12 (CTGC) and -24 (TGGCAC) regions of a typical  $\sigma^{54}$  factor. Arrows indicate conserved inverted repeats, the possible enhancer binding sites of the  $\sigma^{54}$  promoter.

**Fig. S2** Diagram of mutagenesis protocol. The protocols used here for knockout (A) and complementation (B) mutations are summarized in this diagram. For more details see Materials and Methods section.

## A. Knockout protocol

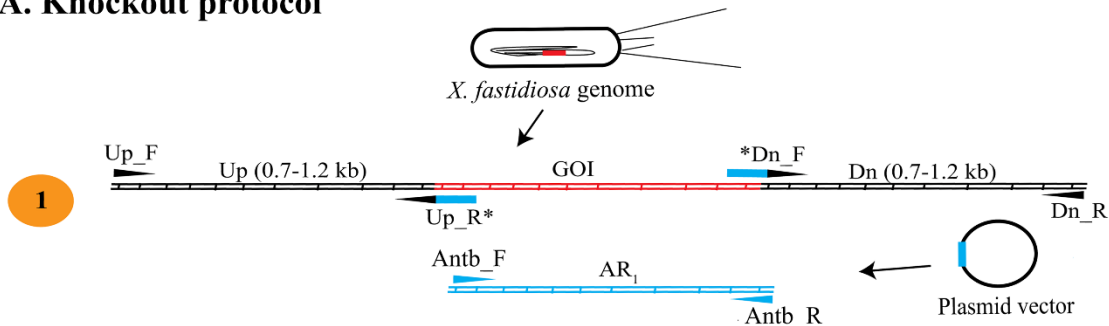

Primer design to amplify upstream (Up) and downstream (Dn) flanking regions of the gene of interest (GOI) from *X. fastidiosa* genome, and an antibiotic resistant marker (AR<sub>1</sub>) from a plasmid vector

\*Primers Up\_R and Dn\_F contain 21-27 bp 5' overhang homologous with AR<sub>1</sub> to promote overlap extension

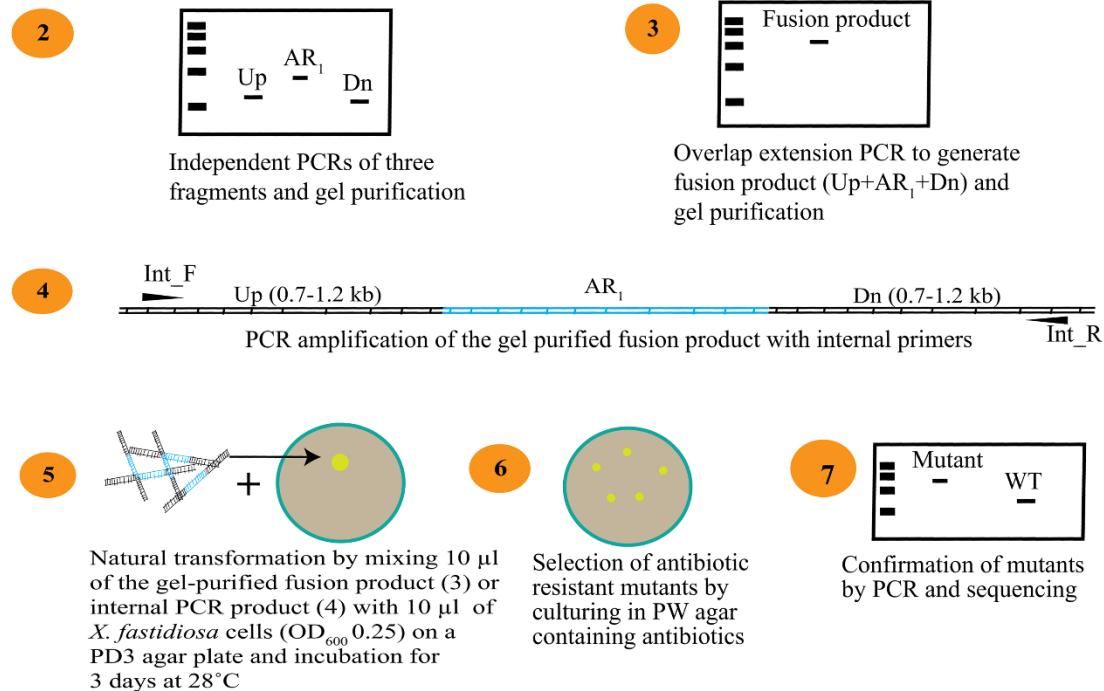

## B. Complementation protocol

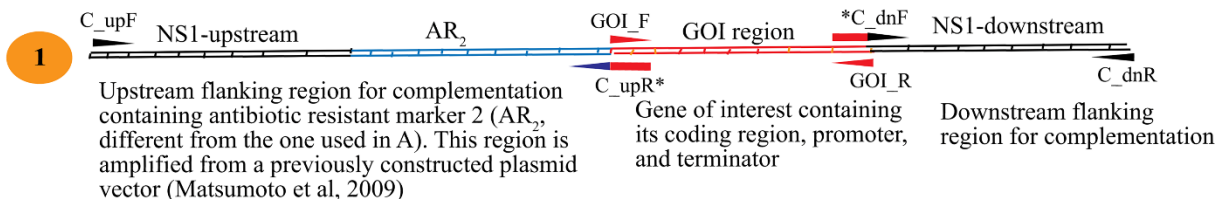

NS1 is a neutral site previously identified in the genome of *X. fastidiosa* Temecula1 (Matsumoto et al, 2009)

2 Follow protocol A from step 2 to 7. In step 5, use the mutant of GOI as recipient and in step 6 use both antibiotics to select for the complemented strains

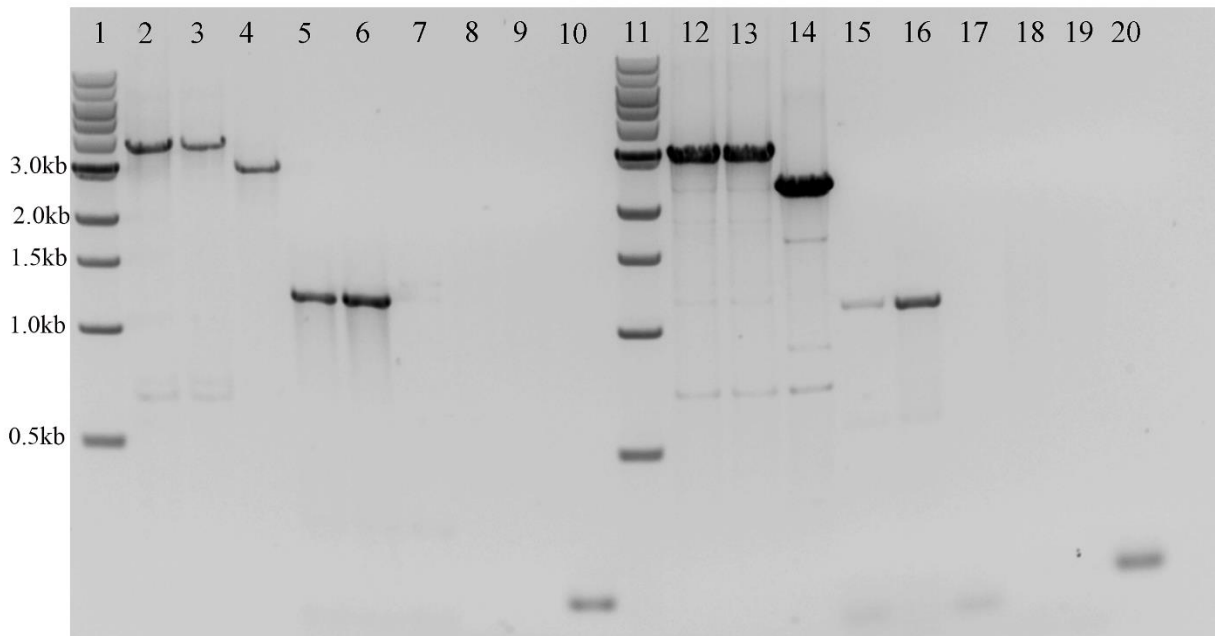

**Fig. S3** Confirmation of *pilA1* (lanes 1-10) and *pilA2* (lanes 11-20) deletion from *Xylella fastidiosa* strains WM1-1 and TemeculaL. Three separate PCRs (out-, antibiotic, *pilA*) were performed to confirm each mutation. Out PCR targeted the region flanking the insertion site of the homologous template, antibiotic PCR targeted the antibiotic marker region, and *pilA* PCR targeted the coding region of each *pilA* paralogs. For each PCR, first and second lanes used DNA templates of the WM1-1 and TemeculaL mutants, respectively and the third lane used DNA template from wild-type WM1-1. Lanes 1 and 11 1kb ladder, lanes 2-4 *pilA1* out PCR, lanes 5-7 antibiotic PCR for *pilA1* (Kanamycin), lanes 8-10 *pilA1* PCR for *pilA1* coding region, lanes 12-14 *pilA2* out PCR, lanes 15-17 antibiotic PCR for *pilA2* (chloramphenicol), lanes 18-20 *pilA2* PCR for *pilA2* coding region. Longer PCR fragment from out-PCR in the mutants than in the wild-type suggest insertion of antibiotic cassettes, which is confirmed by the presence of bands with antibiotic PCR in mutants but not in wild-type. Amplification with the *pilA* specific PCR shows that the mutants lack the target genes and therefore no amplification, but the wild-type have intact gene therefore there is amplification (refer to Table 2 for amplicon sizes).

**References for supplemental material:**

**Matsumoto A, Young GM, Igo MM.** 2009. Chromosome-based genetic complementation system for *Xylella fastidiosa*. *Appl Environ Microbiol* **75**:1679-1687.
